# Supplementary material for: Bioprospecting Deep-Sea Actinobacteria for Novel Anti-infective Natural Products
Source: PubMed Central journal article supplement (PMC5936781; doi:10.3389/fmicb.2018.00787), 2018-04-30
Supplement: Data_Sheet_1.pdf [file Data_Sheet_1.pdf]

## Supplementary Information

### Bioprospecting deep-sea Actinobacteria for novel anti-infective natural products

Dongbo Xu<sup>1, §</sup>, Linna Han<sup>1, §</sup>, Chunhui Li<sup>2, 3, §</sup>, Qi Cao<sup>1</sup>, Duolong Zhu<sup>2</sup>, Nolan H. Barrett<sup>1</sup>, Dedra Harmody<sup>1</sup>, Jing Chen<sup>4</sup>, Haining Zhu<sup>4</sup>, Peter J. McCarthy<sup>1\*</sup>, Xingmin Sun<sup>2\*</sup>, Guojun Wang<sup>1\*</sup>

<sup>1</sup>Harbor Branch Oceanographic Institute, Florida Atlantic University, Fort Pierce, FL, USA  
States

<sup>2</sup>Department of Molecular Medicine, Morsani College of Medicine, University of South Florida, Tampa, FL, USA

<sup>3</sup>Infection Control Center, Xiangya Hospital Central South University, Changsha, China

<sup>4</sup>Department of Molecular and Cellular Biochemistry, University of Kentucky, Lexington, KY, USA

§ These authors contributed to the work equally.

\* Correspondence:

Dr. Peter McCarthy, [pmccart5@fau.edu](mailto:pmccart5@fau.edu)

Dr. Xingmin Sun, [sun5@health.usf.edu](mailto:sun5@health.usf.edu)

Dr. Guojun Wang, [guojunwang@fau.edu](mailto:guojunwang@fau.edu)

## Methods

The *Clostridium difficile* cell lysis assay was performed as described previously (Ericsson et al., 1960). A single colony UK6 was inoculated into BHIS and cultured at 37°C for 24 h; afterwards, 200 µL of UK6 were mixed with 20 mL of BHIS to make UK6-seeded plates. After solidification, 1.0 µL aliquots of vancomycin or M864 extracts WG1-60-60 and WG1-60-61 with different concentrations, 1 or 2 mg/mL, respectively, were dropped onto the plate. Plates were kept at 37°C in an anaerobic chamber for 24-48 h until the inhibition zone is clearly seen. Methanol is included as a negative control.

## References

- Ericsson, B.H., Tunevall, G., and Wickman, K. (1960). The paper disc method for determination of bacterial sensitivity to antibiotics: relationship between the diameter of the zone of inhibition and the minimum inhibitory concentration. *Scand. J. Clin. Lab. Invest.* 12, 414-43 422.
- Sfanos, K., Harmody, D., Dang, P., Ledger, A., Pomponi, S., McCarthy, P., and Lopez, J. (2005). A molecular systematic survey of cultured microbial associates of deep-water marine 46 invertebrates. *Syst. Appl. Microbiol.* 28, 242-264. doi: 10.1016/j.syapm.2004.12.002

## Results

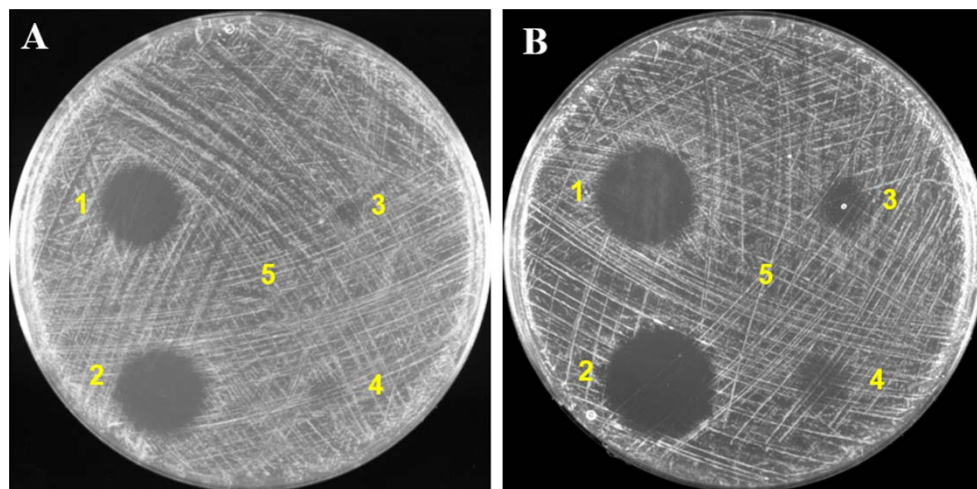

**Figure S1.** Antibacterial activity of the compound **1** using cell lysis assay. Moderate inhibition of *C. difficile* growth was observed. An aliquot of 2  $\mu$ L sample solution at either 3.2 mg/mL (**A**) or 6.4 mg/mL (**B**) was dropped onto the UK6-seeded plate. 1, 2: vancomycin; 3, 4: compound **1**; 5: methanol. No inhibition of other bacterial pathogens, *S. aureus*, MRSA and *P. aeruginosa*, are observed.

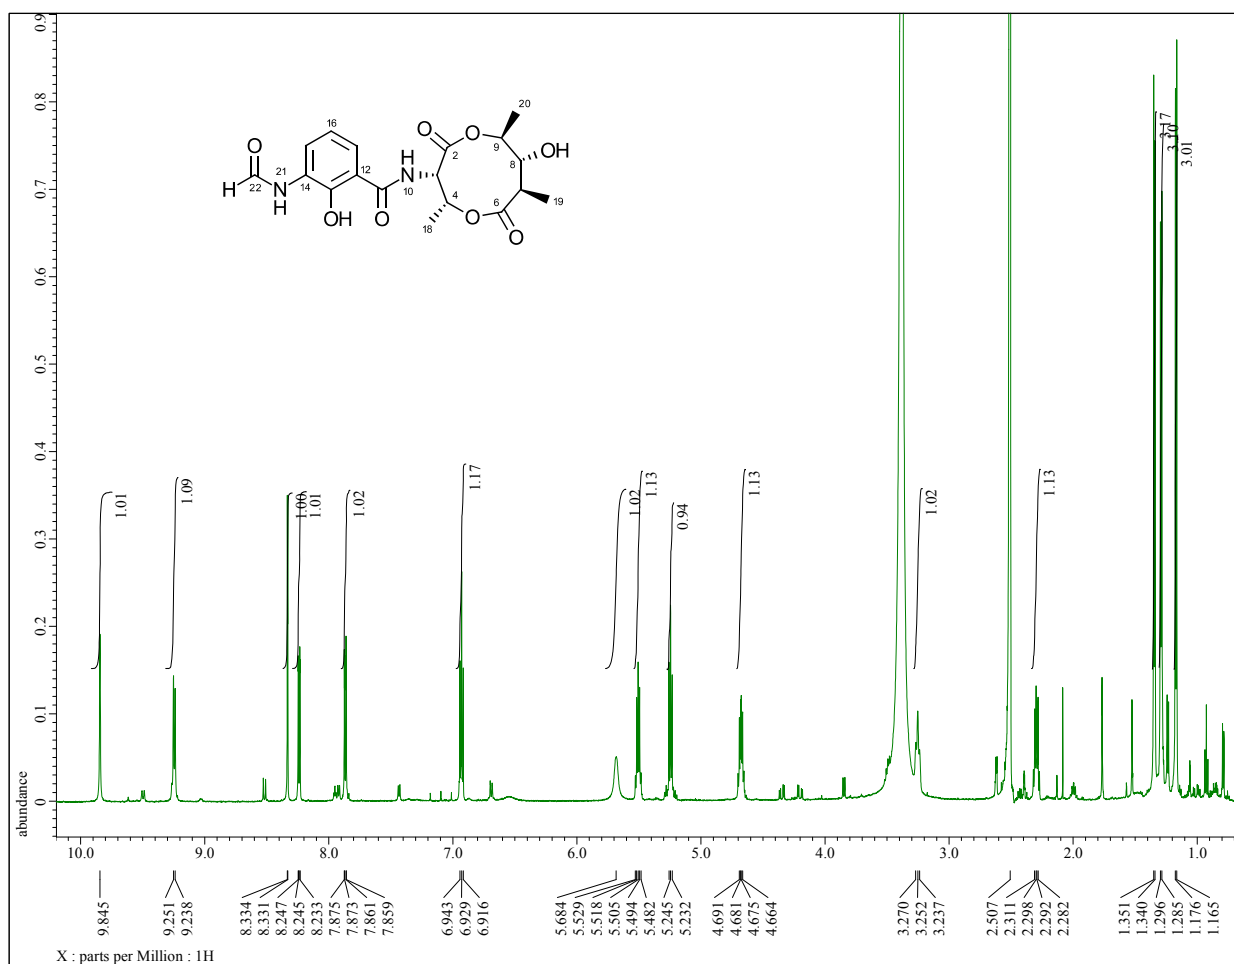

**Figure S2.**  $^1\text{H}$  NMR spectrum of compound **1** in  $\text{DMSO-}d_6$ .

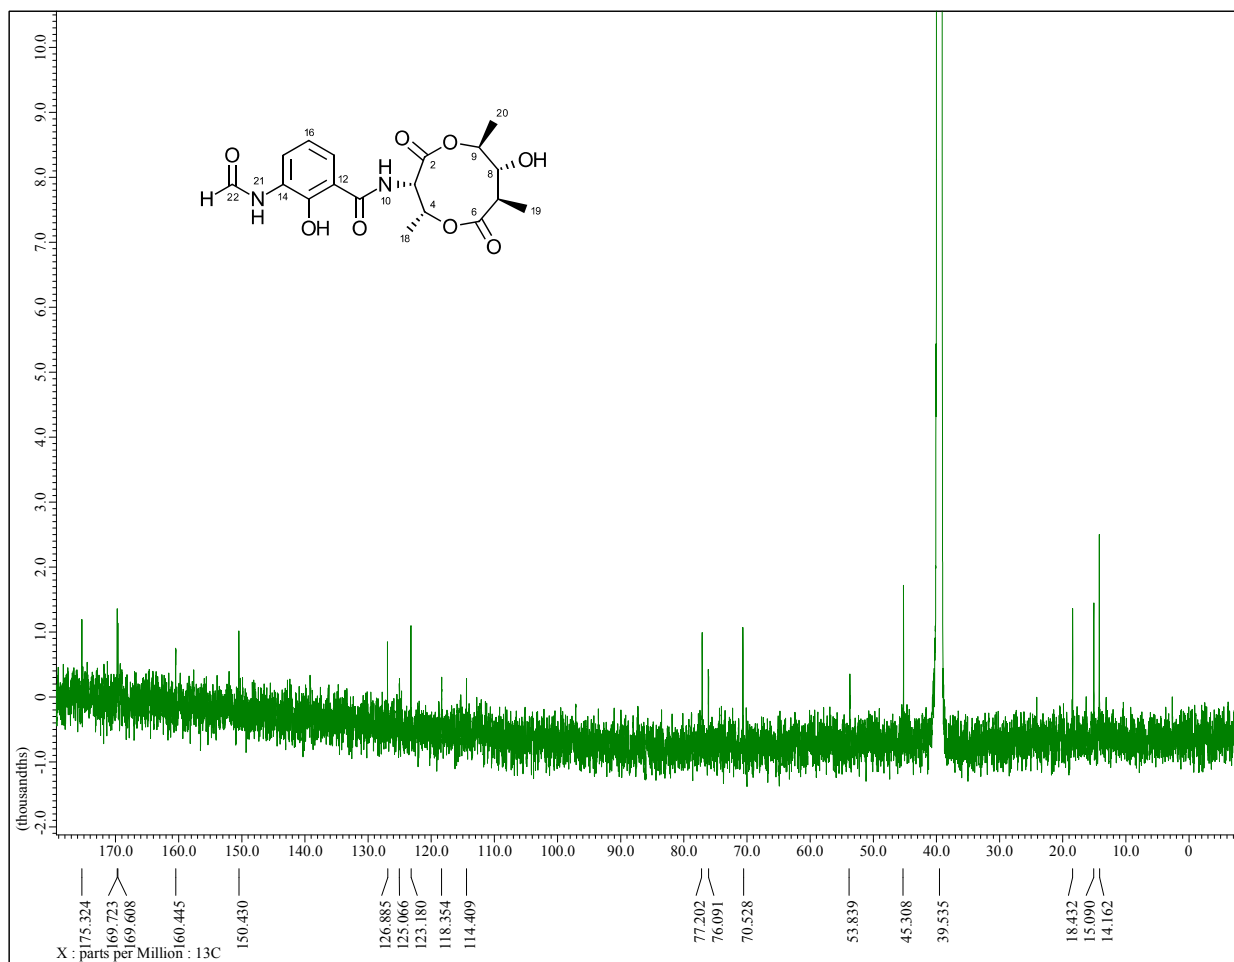

**Figure S3.**  $^{13}\text{C}$  NMR spectrum of compound **1** in  $\text{DMSO-}d_6$ .

**Table S1.** Strains (50) used in this study, taxonomy and their sponge origin.

| No. | Strain | Taxonomy *                                     | Accession No. | Sponge origin (Year**)                                     |
|-----|--------|------------------------------------------------|---------------|------------------------------------------------------------|
| 1   | E432   | <i>Pseudonocardia</i> sp.                      |               | <i>Sarcotagus</i> sp. or<br><i>Smenospongia</i> sp. (1992) |
| 2   | E677   | <i>Streptomyces</i> sp.                        |               | <i>Ircinia felix</i> (1992)                                |
| 3   | H882   | <i>Pseudonocardia</i> sp. SH2                  |               | <i>Thrinacophora funiformis</i><br>(1995)                  |
| 4   | J378   | <i>Nocardiopsis</i> sp.                        |               | <i>Theonella</i> sp. (1996)                                |
| 5   | J379   | <i>Streptomyces</i> sp.                        | AY371434      | <i>Theonella</i> sp. (1996)                                |
| 6   | J380   | <i>Nocardiopsis alborubida</i>                 | AY368532      | <i>Theonella</i> sp. (1996)                                |
| 7   | J653   | <i>Rhodococcus opacus</i>                      |               | <i>Spongosorites</i> sp. (1996)                            |
| 8   | J855   | <i>Gordonia-like</i> sp.                       | AY368507      | <i>Spongosorites</i> sp. (1996)                            |
| 9   | K105   | <i>Pseudonocardia</i> sp. HUST013              |               | <i>Discodermia</i> sp. (1996)                              |
| 10  | K137   | <i>Pseudonocardia</i> sp. AL041005-10          |               | <i>Discodermia</i> sp. (1996)                              |
| 11  | K164   | <i>Pseudonocardia</i> sp. HUST013              |               | <i>Discodermia</i> sp. (1996)                              |
| 12  | K375   | <i>Tsukamurella</i> sp. FXJ1.531               |               | <i>Hexactinellida</i> +<br><i>Zoanthidea</i> (2000)        |
| 13  | K688   | <i>Rhodococcus ruber</i> Er I B2.3             |               | <i>Discodermia</i> sp. (1997)                              |
| 14  | L128   | <i>Streptomyces</i> sp. M7                     |               | <i>Discodermia</i> sp. (1998)                              |
| 15  | L271   | <i>Rhodococcus</i> sp. CNY-462                 |               | <i>Forcepia</i> sp. (1999)                                 |
| 16  | L733   | <i>Streptomyces</i> sp.2                       |               | <i>Axinellida</i> (1999)                                   |
| 17  | M864   | <i>Salinispora</i> sp.                         |               | <i>Oceanapiidae</i> (1993)                                 |
| 18  | N197   | <i>Streptomyces</i> sp. JVCH105X               |               | <i>Forcepia</i> sp. (1999)                                 |
| 19  | N201   | <i>Streptomyces</i> sp.                        |               | <i>Forcepia</i> sp. (1999)                                 |
| 20  | N203   | <i>Streptomyces</i> sp.                        |               | <i>Forcepia</i> sp. (1999)                                 |
| 21  | N212   | <i>Streptomyces noboritoensis</i>              |               | <i>Forcepia</i> sp. (1999)                                 |
| 22  | N217   | <i>Streptomyces</i> sp. S37                    |               | <i>Forcepia</i> sp. (1999)                                 |
| 23  | N218   | <i>Promicromonospora aerolata</i>              |               | <i>Forcepia</i> sp. (1999)                                 |
| 24  | N227   | <i>Promicromonospora</i><br><i>endophytica</i> |               | <i>Forcepia</i> sp. (1999)                                 |
| 25  | N248   | <i>Agrococcus casei</i>                        |               | <i>Forcepia</i> sp. (1999)                                 |
| 26  | N816   | <i>Streptomyces</i> sp.                        |               | <i>Scleritoderma cyanea</i><br>(2000)                      |
| 27  | P114   | <i>Streptomyces</i> sp. FXJ1.412               |               | <i>Discodermia</i> sp. (1996)                              |
| 28  | P183   | <i>Streptomyces</i> sp. FiRh17                 |               | <i>Discodermia</i> sp. (1996)                              |
| 29  | P257   | <i>Salinispora arenicola</i> CNY-685           |               | <i>Discodermia</i> sp. (1996)                              |
| 30  | P419   | <i>Streptomyces</i> sp. FZ92                   |               | <i>Discodermia</i> sp. (1998)                              |

|    |      |                                       |          |                                                     |
|----|------|---------------------------------------|----------|-----------------------------------------------------|
| 31 | P901 | <i>Pseudonocardia</i> sp. AL041005-10 |          | <i>Discodermia</i> sp. (1998)                       |
| 32 | P947 | <i>Mycobacterium</i> sp. L1906        |          | <i>Discodermia</i> sp. (1998)                       |
| 33 | R529 | <i>Nocardiopsis metallicus</i>        | AY368531 | <i>Gorgonacea</i> (2000)                            |
| 34 | R622 | <i>Tsukamurella spongiae</i> K363     |          | <i>Hexactinellida</i> +<br><i>Zoanthidea</i> (2000) |
| 35 | R783 | <i>Pseudonocardia</i> sp.             |          | <i>Forcepia</i> sp. (2001)                          |
| 36 | R786 | <i>Streptomyces albidoflavus</i> S19  |          | <i>Forcepia</i> sp. (2001)                          |
| 37 | R787 | <i>Streptomyces ambofaciens</i> OZK18 |          | <i>Forcepia</i> sp. (2001)                          |
| 38 | R817 | <i>Streptomyces</i> sp. S15           |          | <i>Forcepia</i> sp. (2001)                          |
| 39 | R818 | <i>Streptomyces</i> sp.               |          | <i>Forcepia</i> sp. (2001)                          |
| 40 | R858 | <i>Pseudonocardia</i> sp.             |          | <i>Forcepia</i> sp. (2001)                          |
| 41 | S181 | <i>Pseudonocardia</i> sp.             |          | <i>Discodermia</i> sp. (2000)                       |
| 42 | S355 | <i>Streptomyces</i> sp.               |          | <i>Forcepia</i> sp. (2001)                          |
| 43 | S579 | <i>Pseudonocardia</i> sp. EC080619-01 |          | <i>Forcepia</i> sp. (2001)                          |
| 44 | S653 | <i>Actinomycetospora</i> sp.          |          | <i>Forcepia</i> sp. (2001)                          |
| 45 | V324 | <i>Streptomyces tendae</i>            |          | <i>Theonellidae</i> n.sp. (2004)                    |
| 46 | V453 | <i>Sphingomanas paucimobilis</i>      |          | <i>Leiodermatium</i> sp. (2005)                     |
| 47 | V459 | <i>Leifsonia</i> sp.                  |          | <i>Leiodermatium</i> sp. (2005)                     |
| 48 | V469 | <i>Leifsonia</i> sp.                  |          | <i>Leiodermatium</i> sp. (2005)                     |
| 49 | V474 | <i>Leifsonia</i> sp.                  |          | <i>Leiodermatium</i> sp. (2005)                     |
| 50 | X306 | <i>Erythrobacter</i> sp.              |          | <i>Leiodermatium</i> sp. (2010)                     |

\* Taxonomy is based on Blast analysis of 16S rDNA amplified from each strain.

\*\* The year of sponge sample collection (Sfanos et al., 2005).

**Table S2.** Disk diffusion assay of extractions against *Candida albicans*; *Staphylococcus aureus* and MRSA, *Pseudomonas aeruginosa*. Inhibition is recorded as the diameter of the zone of growth inhibition (mm).

| Strain  | Inhibition zone (mm) |                 |                |      | Concentration <sup>4</sup> |
|---------|----------------------|-----------------|----------------|------|----------------------------|
|         | C.a.                 | MRSA            | S.a.           | P.a. |                            |
| E677    | 9 <sup>1</sup>       | 11              | ND             | ND   | 5                          |
| E677-la | 10                   | 10              | ND             | ND   | 5                          |
| J378    | ND                   | 12              | 9              | ND   | 5                          |
| J378-la | ND                   | 25              | 16             | ND   | 5                          |
| J855    | ND                   | ND              | 18             | ND   | 5                          |
| J855-la | ND                   | ND              | 13             | ND   | 5                          |
| L128    | 12 <sup>1</sup>      | 10              | ND             | ND   | 5                          |
| L128-la | ND                   | 9 <sup>1</sup>  | ND             | ND   | 5                          |
| L733    | ND                   | 13              | 10             | ND   | 5                          |
| L733-la | ND                   | 12              | 10             | ND   | 5                          |
| M864    | ND                   | ND              | 30             | ND   | 5                          |
| M864-la | ND                   | ND              | 32             | ND   | 5                          |
| N197    | ND                   | 9 <sup>1</sup>  | ND             | ND   | 5                          |
| N197-la | ND                   | 10 <sup>1</sup> | ND             | ND   | 5                          |
| N200    | ND                   | 10              | - <sup>2</sup> | ND   | 10                         |
| N200-la | ND                   | 10              | - <sup>2</sup> | ND   | 10                         |
| N201    | 10 <sup>1</sup>      | 16              | - <sup>2</sup> | 9    | 10                         |
| N201-la | ND                   | 13              | - <sup>2</sup> | ND   | 10                         |
| N203    | 12                   | 18              | - <sup>2</sup> | 14   | 10                         |
| N203-la | ND                   | 11              | - <sup>2</sup> | ND   | 10                         |
| N217    | 11                   | 20              | 14             | 14   | 5                          |
| N217-la | ND                   | 16              | 13             | 10   | 5                          |
| N218    | 9                    | 10 <sup>1</sup> | - <sup>2</sup> | ND   | 10                         |
| N218-la | 8 <sup>1</sup>       | 10 <sup>1</sup> | - <sup>2</sup> | ND   | 10                         |
| N227    | 10 <sup>1</sup>      | ND              | - <sup>2</sup> | ND   | 10                         |
| N227-la | 12 <sup>1</sup>      | ND              | - <sup>2</sup> | ND   | 10                         |
| N248    | ND                   | ND              | - <sup>2</sup> | ND   | 10                         |
| N248-la | ND                   | 10              | - <sup>2</sup> | ND   | 10                         |



|                  |                 |                 |                |                 |    |
|------------------|-----------------|-----------------|----------------|-----------------|----|
| N816             | ND              | ND              | ND             | ND              | 5  |
| N816-la          | ND              | 11              | 12             | ND <sup>3</sup> | 5  |
| P114             | ND              | 9               | ND             | ND              | 5  |
| P114-la          | 13 <sup>1</sup> | 10              | ND             | ND              | 5  |
| P183             | ND              | 9 <sup>1</sup>  | ND             | ND              | 5  |
| P183-la          | ND              | 9 <sup>1</sup>  | ND             | ND              | 5  |
| P257             | ND              | ND              | 12             | ND              | 5  |
| P257-la          | ND              | ND              | 26             | ND              | 5  |
| P419             | ND              | 8               | ND             | ND              | 5  |
| P419-la          | ND              | ND              | 8              | ND              | 5  |
| P901             | 9               | ND              | ND             | ND              | 5  |
| P901-la          | ND              | ND              | ND             | ND              | 5  |
| R786             | 22              | 12 <sup>1</sup> | ND             | ND              | 5  |
| R786-la          | 22              | 13 <sup>1</sup> | ND             | ND              | 5  |
| R787             | ND              | 8               | ND             | ND              | 5  |
| R787-la          | ND              | 8               | ND             | ND              | 5  |
| R817             | ND              | 10              | ND             | ND              | 5  |
| R817-la          | ND              | 11 <sup>1</sup> | ND             | ND              | 5  |
| R818             | ND              | ND              | - <sup>2</sup> | ND              | 10 |
| R818-la          | 21              | ND              | - <sup>2</sup> | ND              | 10 |
| S355             | ND              | ND              | - <sup>2</sup> | ND              | 10 |
| S355-la          | ND              | 10 <sup>1</sup> | - <sup>2</sup> | ND              | 10 |
| S653             | ND              | 12              | - <sup>2</sup> | ND              | 10 |
| S653-la          | ND              | 9               | - <sup>2</sup> | ND              | 10 |
| V324             | ND              | 11              | - <sup>2</sup> | ND              | 5  |
| V324-la          | ND              | 15              | - <sup>2</sup> | ND              | 5  |
| Positive control | 27              | 19              | 22             | 23              |    |

Note: C.a., *C. albicans*; S.a., *S. aureus*; P.a., *P. aeruginosa*. Positive controls are nystatin (100 U) for *C. albicans*; cefoxitin (30 µg) for MRSA; gentamicin (10 µg) for *S. aureus* and *P. aeruginosa*. ‘-la’, cultures supplemented with 2 mM LaCl<sub>3</sub>; ND, activity not detected; <sup>1</sup>, the edge of inhibition zone is hazy; <sup>-2</sup>, not determined; <sup>3</sup>, anti-P.a. activity was observed only using

partially purified fractions; <sup>4</sup>, extractions are dissolved in methanol with a final concentration of 5 or 10 mg/mL.
